# Supplementary material for: Immune Profiling of Adenoid Cystic Carcinoma: PD-L2 Expression and Associations with Tumor-Infiltrating Lymphocytes
Source: Oxford University Press journal article supplement (doi:10.1158/2326-6066.cir-16-0031), 2016-06-16
Supplement: 23266066cir160031-sup-162297_1_supp_3496620_z7z9hz.docx [file 23266066cir160031-sup-162297_1_supp_3496620_z7z9hz.docx]

| Supplemental Table 1. Genes associated with poor immune infiltration | | | | |  |  |
| --- | --- | --- | --- | --- | --- | --- |
|  |  |  |  |  |  |  |
|  |  | **Log fold change (no infiltrate/infiltrate)** | **Lower confidence limit** | **Upper confidence limit** | **P-value** | **Pathways** |
|  | LAMA3 | -1.454535803 | -2.591141037 | -0.31793057 | 0.025063848 | PI3K |
|  | COL4A5 | -1.259350988 | -2.117081853 | -0.401620124 | 0.012165336 | PI3K |
|  | FGF17 | -1.122797522 | -1.760973049 | -0.484621995 | 0.003917104 | MAPK, PI3K, RAS |
|  | BAMBI | -1.010046162 | -1.756268285 | -0.26382404 | 0.018919798 | Wnt, TGFB |
|  | LAMC2 | -0.957717082 | -1.463371046 | -0.452063118 | 0.002320259 | PI3K |
|  | RNF43 | -0.937338372 | -1.666729274 | -0.207947469 | 0.024558068 |  |
|  | CDH1 | -0.883482161 | -1.57697606 | -0.189988262 | 0.02561676 |  |
|  | BCL2 | -0.857524886 | -1.398365716 | -0.316684057 | 0.007714136 | PI3K, Apop |
|  | LAMB3 | -0.799147435 | -1.421971621 | -0.176323249 | 0.024744505 | PI3K |
|  | GNG7 | -0.681735471 | -1.297983437 | -0.065487504 | 0.047857016 | PI3K, RAS |
|  | PLD1 | -0.552979547 | -0.93536968 | -0.170589414 | 0.013251784 | RAS |
|  | CXXC4 | -0.545302816 | -0.946628775 | -0.143976856 | 0.018546356 | Wnt |
|  | ITGA3 | -0.541312581 | -1.012759226 | -0.069865936 | 0.041018168 | PI3K |
|  | PBX1 | -0.41876134 | -0.707986683 | -0.129535997 | 0.013162042 | TXmisReg |
|  | CTNNB1 | -0.342761946 | -0.607851957 | -0.077671934 | 0.023832408 | Wnt |
|  | MDC1 | -0.263368292 | -0.502780385 | -0.023956199 | 0.0489553 | DNARepair |
|  | MAPK8 | -0.234928663 | -0.389193892 | -0.080663435 | 0.009842418 | Wnt, MAPK, RAS |
|  | ERCC6 | -0.22660287 | -0.393031821 | -0.060173919 | 0.01834805 | DNARepair |
|  | SKP1 | -0.204658798 | -0.359483469 | -0.049834127 | 0.021353123 | Wnt, TGFB, CC |
|  |  |  |  |  |  |  |

| Supplemental Table 2. Seromic profiles | |  |  |
| --- | --- | --- | --- |
|  |  |  |  |
|  | **Antibody protein target generating increased signal following treatment** | **Fold Change (post-treatment/pre-treatment)** | **Increase in signal also observed in saliva** |
|  | PDZ domain containing 11 (PDZD11) | 23.16055298 |  |
|  | guanylate cyclase activator 1A (retina) (GUCA1A) | 22.80304909 |  |
|  | IGF-II Recombinant Human Protein | 16.02793312 |  |
|  | Cyclin-dependent kinase-like 3 | 15.81198215 | X |
|  | Acyl-Coenzyme A dehydrogenase, long chain (ACADL), mRNA | 15.17184258 |  |
|  | Retinoic acid receptor RXR-gamma | 11.60251999 |  |
|  | Cyclin-dependent kinase-like 3, mRNA (cDNA clone MGC:41758 IMAGE:5298279), complete cds | 11.37290192 | X |
|  | Ribosomal protein L3, mRNA (cDNA clone MGC:14821 IMAGE:4251511), complete cds | 10.78386784 |  |
|  | Recombining binding protein suppressor of hairless (Drosophila) (RBPSUH), transcript variant 3, mRNA | 10.2132206 |  |
|  | Cytochrome c oxidase assembly protein COX19 | 10.19131851 |  |
|  | Uncharacterized protein C19orf44 | 8.697468758 |  |
|  | Similar to activated p21cdc42Hs kinase, clone MGC:15139 IMAGE:4302390, mRNA, complete cds | 8.387566566 |  |
|  | Pygopus homolog 2 (Drosophila) (PYGO2), mRNA | 8.247319221 |  |
|  | proline-rich transmembrane protein 2 (PRRT2) | 8.121165276 |  |
|  | Non-POU domain containing, octamer-binding, mRNA (cDNA clone MGC:3380 IMAGE:2957871), complete cds | 8.004833221 |  |
|  | Rho-related BTB domain containing 1 (RHOBTB1), transcript variant 1 | 7.783424854 |  |
|  | stromal membrane-associated protein 1 (SMAP1) | 7.595106125 |  |
|  | myeloid/lymphoid or mixed-lineage leukemia (trithorax homolog, Drosophila); translocated to, 6 (MLLT6) | 7.548398972 |  |
|  | ubiquitin carboxyl-terminal hydrolase L5 (UCHL5) | 7.418568134 |  |
|  | Band 4.1-like protein 4A | 7.266551971 |  |
|  | Protein DDI1 homolog 1 | 7.221550941 |  |
|  | histone cluster 2, H2ac (HIST2H2AC) | 6.81694746 |  |
|  | Ermin | 6.807658672 | X |
|  | kelch-like 32 (Drosophila) (KLHL32) | 6.529049397 |  |
|  | Calpastatin | 6.258220196 |  |
|  | calumenin (CALU) | 6.165356636 |  |
|  | Clone MGC:15420 IMAGE:4054579, mRNA, complete cds | 6.131331921 |  |
|  | chromosome 10 open reading frame 63 (C10orf63) | 5.590974808 |  |
|  | RD RNA binding protein (RDBP) | 5.359972954 |  |
|  | fibroblast growth factor 12 (FGF12), transcript variant 1 | 5.357107639 |  |
|  | Syndecan-1 | 5.156929016 |  |
|  | chromosome 9 open reading frame 78 (C9orf78) | 5.147566795 |  |
|  | within bgcn homolog (Drosophila) (WIBG) | 5.138507843 |  |
|  | NAD-dependent deacetylase sirtuin-1 | 5.123523235 |  |
|  | glutamate receptor, ionotropic, N-methyl D-aspartate-like 1A (GRINL1A), transcript variant 1 | 5.101050854 |  |
|  | lysophospholipase-like 1 (LYPLAL1) | 5.088976383 |  |
|  | CCHC-type zinc finger, nucleic acid binding protein (CNBP) | 4.991729259 |  |
|  | Fanconi anemia, complementation group M (FANCM) | 4.983356953 |  |
|  | coiled-coil-helix-coiled-coil-helix domain containing 2 (CHCHD2) | 4.911604404 |  |
|  | golgi associated, gamma adaptin ear containing, ARF binding protein 2 (GGA2), transcript variant 2 | 4.822281361 |  |
|  | fibroblast growth factor 13 (FGF13), transcript variant 1A | 4.806780338 |  |
|  | chromosome 12 open reading frame 52 (C12orf52) | 4.764377117 |  |
|  | CWC15 homolog (S. cerevisiae) (HSPC148) | 4.567389488 |  |
|  | interferon, gamma-inducible protein 30 (IFI30) | 4.560975552 |  |
|  | PWWP domain-containing protein 2B | 4.529004574 |  |
|  | protocadherin gamma subfamily C, 3 (PCDHGC3), transcript variant 3 | 4.493583202 |  |
|  | aldehyde dehydrogenase 7 family, member A1 (ALDH7A1) | 4.487752914 |  |
|  | phosphodiesterase 4D interacting protein (myomegalin) (PDE4DIP) | 4.473556995 |  |
|  | Signal recognition particle 19 kDa protein | 4.468637466 |  |
|  | p53 and DNA damage regulated 1 (PDRG1) | 4.465902805 |  |
|  | heterogeneous nuclear ribonucleoprotein U-like 1, mRNA (cDNA clone IMAGE:3619753), complete cds. | 4.463695049 |  |
|  | endosulfine alpha (ENSA), transcript variant 3 | 4.454667568 |  |
|  | RNA binding motif protein 12 (RBM12), transcript variant 1, mRNA | 4.448147297 |  |
|  | coiled-coil domain containing 25 (CCDC25) | 4.448105335 |  |
|  | Chromosome 1 open reading frame 144 (C1orf144), mRNA | 4.436867714 |  |
|  | Wolf-Hirschhorn syndrome candidate 2 (WHSC2) | 4.405805111 |  |
|  | PREDICTED: Homo sapiens hypothetical LOC401363 (LOC401363) | 4.394236565 |  |
|  | family with sequence similarity 50, member A (FAM50A) | 4.383622646 |  |
|  | ATG16 autophagy related 16-like 1 (S. cerevisiae) (ATG16L1), transcript variant 1 | 4.34966135 |  |
|  | chromosome 21 open reading frame 33 (C21orf33), nuclear gene encoding mitochondrial protein, transcript variant 1 | 4.347075939 |  |
|  | Cas-Br-M (murine) ecotropic retroviral transforming sequence b (CBLB) | 4.340308189 |  |
|  | Histone 1, H1c (HIST1H1C), mRNA | 4.320867062 |  |
|  | transcription factor AP-4 (activating enhancer binding protein 4) (TFAP4) | 4.318903923 |  |
|  | ligase III, DNA, ATP-dependent (LIG3), nuclear gene encoding mitochondrial protein, transcript variant alpha | 4.283953667 |  |
|  | guanine nucleotide binding protein-like 3 (nucleolar)-like (GNL3L) | 4.27796936 |  |
|  | cDNA clone IMAGE:3451214 (MCM10) | 4.265154362 |  |
|  | peroxiredoxin 3 (PRDX3) | 4.236625671 |  |
|  | BAFF / TNFSF13B Protein | 4.233496189 |  |
|  | sorting nexin 11 (SNX11), transcript variant 2 | 4.231047153 |  |
|  | Spermatid nuclear transition protein 4 | 4.227414131 |  |
|  | Serine/threonine-protein kinase D3 | 4.221912861 |  |
|  | profilin 2 (PFN2), transcript variant 2, mRNA. | 4.207321167 |  |
|  | S100 calcium binding protein B (S100B) | 4.158085823 |  |
|  | IMP (inosine monophosphate) dehydrogenase 2 (IMPDH2) | 4.149326324 |  |
|  | RWD domain containing 4A (RWDD4A) | 4.134375095 |  |
|  | regulatory factor X, 5 (influences HLA class II expression) (RFX5), transcript variant 1 | 4.117451668 |  |
|  | chromosome 11 open reading frame 52 (C11orf52) | 4.114673138 |  |
|  | Methyl-CpG-binding domain protein 3 | 4.08771944 |  |
|  | SERPINE1 mRNA binding protein 1 (SERBP1), transcript variant 4 | 4.084376335 |  |
|  | Coenzyme A synthase (COASY), transcript variant 1 | 4.08434391 |  |
|  | dynein, axonemal, light intermediate chain 1 (DNALI1) | 4.078778267 |  |
|  | p21(CDKN1A)-activated kinase 4 (PAK4) | 4.06998539 |  |
|  | TBP-like 1 (TBPL1) | 4.010197639 |  |
|  | myotilin (MYOT) | 3.992358923 |  |
|  | Coiled-coil domain-containing protein 46 | 3.976576567 |  |
|  | RNA binding motif (RNP1, RRM) protein 3 (RBM3), transcript variant 2, mRNA | 3.975127459 |  |
|  | nucleolar protein family A, member 2 (H/ACA small nucleolar RNPs) (NOLA2), transcript variant 1 | 3.966744423 |  |
|  | coiled-coil domain containing 12 (CCDC12) | 3.961659908 |  |
|  | Probable ATP-dependent RNA helicase DDX6 | 3.957130432 |  |
|  | Nucleolar and spindle-associated protein 1 | 3.937179565 |  |
|  | aurora kinase A (AURKA), transcript variant 2 | 3.927309275 |  |
|  | huntingtin interacting protein 1 (HIP1) | 3.918273211 |  |
|  | protein phosphatase 1A (formerly 2C), magnesium-dependent, alpha isoform (PPM1A), transcript variant 2 | 3.9113729 |  |
|  | SNRPN upstream reading frame (SNURF), transcript variant 1 | 3.896440029 |  |
|  | cDNA clone IMAGE:3050953 | 3.839604855 |  |
|  | WD repeat domain 45 (WDR45), transcript variant 2 | 3.820797443 | X |
|  | KIAA1530 protein (KIAA1530) | 3.808636189 |  |
|  | rhomboid, veinlet-like 2 (Drosophila) (RHBDL2) | 3.806471586 |  |
|  | viral DNA polymerase-transactivated protein 6 (LOC26010) | 3.80298996 |  |
|  | ribosomal protein S19 (RPS19) | 3.786121368 |  |
|  | methionyl aminopeptidase 2 (METAP2) | 3.781917334 |  |
|  | aurora kinase B (AURKB) | 3.770969391 |  |
|  | family with sequence similarity 102, member A (FAM102A), transcript variant 2 | 3.769767523 |  |
|  | ankyrin repeat domain 50 (ANKRD50) | 3.76431489 |  |
|  | Histone H2A type 1-C | 3.758599997 |  |
|  | Bromodomain and PHD finger containing, 3 (BRPF3), mRNA | 3.737912178 |  |
|  | Protein phosphatase Slingshot homolog 3 | 3.731894732 |  |
|  | Finkel-Biskis-Reilly murine sarcoma virus (FBR-MuSV) ubiquitously expressed (FAU) | 3.713405132 |  |
|  | polo-like kinase 1 (Drosophila) (PLK1) | 3.7119205 |  |
|  | CD16a / FCGR3A Protein (His Tag) | 3.69945097 |  |
|  | LIM and senescent cell antigen-like-containing domain protein 1 | 3.698341846 |  |
|  | decapping enzyme, scavenger (DCPS) | 3.692070484 |  |
|  | chromosome 8 open reading frame 59 (C8orf59) | 3.652210236 |  |
|  | FBJ murine osteosarcoma viral oncogene homolog B, mRNA (cDNA clone MGC:42291 IMAGE:4816584), complete cds | 3.64330554 |  |
|  | Chromosome 21 open reading frame 49 (C21orf49), mRNA | 3.607156038 |  |
|  | La ribonucleoprotein domain family, member 1 (LARP1) | 3.569606066 |  |
|  | Protein MCM10 homolog | 3.568965435 |  |
|  | membrane-associated ring finger (C3HC4) 8 (MARCH8), transcript variant 8 | 3.56389451 |  |
|  | Chromosome 10 open reading frame 4, mRNA (cDNA clone MGC:24718 IMAGE:4278022), complete cds | 3.547619104 |  |
|  | Hypothetical gene MGC45922, mRNA (cDNA clone MGC:45922 IMAGE:5428578), complete cds | 3.531402826 |  |
|  | Specifically androgen-regulated gene protein | 3.508795738 |  |
|  | elongation factor 1 homolog (S. cerevisiae) (ELOF1) | 3.485232115 |  |
|  | angiomotin like 2 (AMOTL2) | 3.483409643 |  |
|  | potassium voltage-gated channel, shaker-related subfamily, beta member 1 (KCNAB1), transcript variant 1 | 3.475115538 |  |
|  | Similar to RIKEN 4933439F11 (LOC388389), mRNA | 3.467863083 |  |
|  | GABA(A) receptor-associated protein-like 2 (GABARAPL2) | 3.444352865 |  |
|  | Transcription factor AP-2 delta (activating enhancer binding protein 2 delta) (TFAP2D), mRNA | 3.441977739 |  |
|  | family with sequence similarity 62 (C2 domain containing) member B (FAM62B) | 3.439112186 |  |
|  | chromosome 9 open reading frame 37 (C9orf37) | 3.437908411 |  |
|  | FK506 binding protein 1B, 12.6 kDa (FKBP1B), transcript variant 2 | 3.436138868 |  |
|  | Protein NOXP20 | 3.40236187 |  |
|  | Calpain, small subunit 1, mRNA (cDNA clone MGC:75186 IMAGE:5785274), complete cds | 3.399116516 |  |
|  | spermatogenesis associated 2 (SPATA2) | 3.389735699 |  |
|  | zinc finger protein 688 (ZNF688), transcript variant 1 | 3.384918213 |  |
|  | single-stranded DNA binding protein 2 (SSBP2) | 3.375045538 |  |
|  | nucleophosmin (nucleolar phosphoprotein B23, numatrin) (NPM1) | 3.334196806 |  |
|  | proteasome (prosome, macropain) 26S subunit, non-ATPase, 10 (PSMD10), transcript variant 2 | 3.305983782 |  |
|  | ubiquitin-conjugating enzyme E2M (UBC12 homolog, yeast) (UBE2M) | 3.297731638 | X |
|  | SH2 domain protein 2A (SH2D2A) | 3.285401106 |  |
|  | PREDICTED: Homo sapiens hypothetical gene supported by BC047417, transcript variant 1 (LOC400027) | 3.267707109 |  |
|  | Cyclin-Y | 3.267549992 |  |
|  | WAS/WASL-interacting protein family member 1 | 3.216358662 |  |
|  | A.T hook DNA-binding motif-containing protein 1 | 3.215053797 |  |
|  | growth arrest-specific 2 (GAS2), transcript variant 2 | 3.21139431 |  |
|  | homer homolog 2 (Drosophila) (HOMER2) | 3.207305908 |  |
|  | basic leucine zipper transcription factor, ATF-like 2 (BATF2) | 3.194305658 |  |
|  | Kelch-like ECH-associated protein 1 | 3.170363903 |  |
|  | GTP binding protein 1 (GTPBP1) | 3.167523146 |  |
|  | tumor protein D52-like 1 (TPD52L1), transcript variant 3 | 3.143975019 |  |
|  | ubiquitin-activating enzyme E1-like 2 (UBE1L2) | 3.142683029 |  |
|  | Smoothelin-like protein 2 | 3.121351719 |  |
|  | kinesin family member 3A (KIF3A) | 3.116311312 |  |
|  | zinc finger protein 691 (ZNF691) | 3.112423182 |  |
|  | hypothetical LOC401052 (LOC401052) | 3.104604483 |  |
|  | dermatopontin (DPT) | 3.079573154 |  |
|  | CKLF-like MARVEL transmembrane domain containing 1 (CMTM1), transcript variant 6, mRNA | 3.039397955 |  |
|  | chromosome 9 open reading frame 9 (C9orf9) | 3.025746346 |  |
|  | male-specific lethal 3-like 1 (Drosophila) (MSL3L1), transcript variant 2 | 3.022130013 |  |
|  | Splicing factor 45 | 3.02147007 |  |
|  | UPF3 regulator of nonsense transcripts homolog A (yeast) (UPF3A) | 3.016472101 |  |
|  | Non-histone chromosomal protein HMG-14 | 3.005731344 |  |
|  | cDNA clone IMAGE:5271031 | 2.995171309 |  |
|  | protein-L-isoaspartate (D-aspartate) O-methyltransferase (PCMT1) | 2.981328726 |  |
|  | SEC24 related gene family, member C (S. cerevisiae) (SEC24C), transcript variant 1 | 2.969658136 |  |
|  | La ribonucleoprotein domain family, member 6 (LARP6), transcript variant 1 | 2.952886343 |  |
|  | melanoma antigen family B, 1 (MAGEB1), transcript variant 1 | 2.949818611 |  |
|  | chromosome 14 open reading frame 131 (C14orf131) | 2.947333574 |  |
|  | unkempt homolog (Drosophila)-like (UNKL) | 2.926898718 |  |
|  | potassium channel tetramerisation domain containing 18 (KCTD18) | 2.92306757 |  |
|  | Ras-like without CAAX 1 (RIT1) | 2.916295528 |  |
|  | DEAD (Asp-Glu-Ala-Asp) box polypeptide 43 (DDX43) | 2.915221691 |  |
|  | proline rich 15 (PRR15) | 2.9004848 |  |
|  | Serine/threonine-protein kinase 6 | 2.8939147 |  |
|  | activator of basal transcription 1 (ABT1) | 2.890050411 |  |
|  | synaptotagmin-like 2 (SYTL2), transcript variant a | 2.875857353 |  |
|  | small nuclear ribonucleoprotein 70kDa polypeptide (RNP antigen) (SNRP70) | 2.874586105 |  |
|  | zinc finger protein 207 (ZNF207), transcript variant 2 | 2.852986813 |  |
|  | high mobility group AT-hook 1 (HMGA1), transcript variant 1 | 2.82871747 |  |
|  | adenosine deaminase, tRNA-specific 1 (ADAT1) | 2.827881813 |  |
|  | chromosome 20 open reading frame 112 (C20orf112) | 2.823529482 |  |
|  | heterogeneous nuclear ribonucleoprotein A1 (HNRNPA1), transcript variant 1 | 2.813972712 |  |
|  | splicing factor, arginine/serine-rich 1 (splicing factor 2, alternate splicing factor) (SFRS1), transcript variant 1 | 2.808903456 |  |
|  | MRG-binding protein | 2.798288584 |  |
|  | ATPase, H+ transporting, lysosomal 13kDa, V1 subunit G1 (ATP6V1G1) | 2.792428255 |  |
|  | Protein FAM76B | 2.779980898 |  |
|  | neuropeptide Y (NPY) | 2.776082039 |  |
|  | Growth factor receptor-bound protein 7 | 2.770956993 |  |
|  | protein kinase C, zeta (PRKCZ), transcript variant 1 | 2.770690203 |  |
|  | Chromosome 3 open reading frame 35 (C3orf35), transcript variant A, mRNA | 2.768423796 |  |
|  | Mitochondrial import inner membrane translocase subunit TIM14 | 2.767329693 |  |
|  | Nucleolar and spindle associated protein 1 (NUSAP1), transcript variant 1, mRNA | 2.758774519 |  |
|  | methyltransferase like 1 (METTL1), transcript variant 1 | 2.758476257 |  |
|  | Transformer-2 protein homolog | 2.749277353 |  |
|  | PREDICTED: Homo sapiens hypothetical protein LOC339685 (LOC339685) | 2.74720335 |  |
|  | proteasome (prosome, macropain) 26S subunit, non-ATPase, 4 (PSMD4), transcript variant 2 | 2.745486021 |  |
|  | surfeit 2 (SURF2) | 2.742318392 |  |
|  | uracil-DNA glycosylase (UNG), transcript variant 2 | 2.739766121 |  |
|  | MOB1, Mps One Binder kinase activator-like 2A (yeast) (MOBKL2A) | 2.733544827 |  |
|  | zinc finger protein 192 (ZNF192) | 2.725601196 |  |
|  | cDNA clone MGC:17410 IMAGE:4156035, complete cds | 2.722691536 |  |
|  | CD14 Protein | 2.703197002 |  |
|  | Histone deacetylase complex subunit SAP18 | 2.692662477 |  |
|  | chromosome 1 open reading frame 174 (C1orf174) | 2.677279711 |  |
|  | Hypothetical protein LOC285016 (LOC285016), mRNA | 2.675202131 |  |
|  | influenza_A | 2.670713186 |  |
|  | pescadillo homolog 1, containing BRCT domain (zebrafish) (PES1) | 2.669394493 |  |
|  | Serine/threonine-protein kinase VRK3 | 2.663034678 |  |
|  | development and differentiation enhancing factor-like 1 (DDEFL1) | 2.65888834 |  |
|  | eukaryotic translation initiation factor 4E family member 2 (EIF4E2) | 2.649243355 |  |
|  | GRIP and coiled-coil domain-containing protein 1 | 2.644779682 |  |
|  | microcephaly, primary autosomal recessive 1 (MCPH1) | 2.607896328 |  |
|  | pleckstrin homology-like domain, family A, member 1 (PHLDA1) | 2.592378139 |  |
|  | GTP binding protein 4 (GTPBP4), mRNA | 2.591438293 |  |
|  | pogo transposable element with ZNF domain (POGZ), transcript variant 3 | 2.575284004 |  |
|  | Exosome complex exonuclease RRP40 | 2.571325064 |  |
|  | Secretoglobin, family 1D, member 4 (SCGB1D4), mRNA | 2.558626413 |  |
|  | La ribonucleoprotein domain family, member 4 (LARP4), transcript variant 3 | 2.544330597 |  |
|  | AT rich interactive domain 3B (BRIGHT-like) (ARID3B) | 2.542840958 |  |
|  | YTH domain family, member 2 (YTHDF2) | 2.515151501 |  |
|  | aryl-hydrocarbon receptor nuclear translocator 2 (ARNT2) | 2.506437778 |  |
|  | Leiomodin-1 | 2.466687679 |  |
|  | Rho GTPase-activating protein 12 | 2.461466789 |  |
|  | HBS1-like (S. cerevisiae) (HBS1L) | 2.455637932 |  |
|  | nudE nuclear distribution gene E homolog 1 (A. nidulans) (NDE1) | 2.452830076 |  |
|  | Chromosome 3 open reading frame 35 (C3orf35), transcript variant F, mRNA | 2.449491262 |  |
|  | GABA(A) receptor-associated protein (GABARAP) | 2.448655367 |  |
|  | FK506 binding protein like (FKBPL) | 2.446801901 |  |
|  | transcription elongation factor A (SII)-like 2 (TCEAL2) | 2.445666552 |  |
|  | BAI1-associated protein 2 (BAIAP2), transcript variant 2 | 2.438859701 |  |
|  | Chemokine-like factor (CKLF), transcript variant 3, mRNA | 2.431123257 |  |
|  | Hypothetical protein LOC143188 (LOC143188), mRNA | 2.423508883 |  |
|  | IGF2 / IGFII / Somatomedin-A protein ( NusA Tag ) | 2.418890476 |  |
|  | zinc finger protein 280B (SUHW2) | 2.394270897 |  |
|  | phosphatidylinositol binding clathrin assembly protein (PICALM), transcript variant 2 | 2.39338851 |  |
|  | mannose phosphate isomerase (MPI) | 2.386243343 |  |
|  | PREDICTED: Homo sapiens hypothetical gene supported by AK026100, transcript variant 1 (FLJ22447) | 2.380990028 |  |
|  | alcohol dehydrogenase, iron containing, 1 (ADHFE1) | 2.377989769 |  |
|  | Uncharacterized protein C1orf77 | 2.361827374 |  |
|  | Chromosome 21 open reading frame 34 (C21orf34), transcript variant 1, mRNA | 2.358509541 |  |
|  | 6-phosphofructo-2-kinase/fructose-2,6-biphosphatase 2 (PFKFB2), transcript variant 1 | 2.34388113 |  |
|  | ARP1 actin-related protein 1 homolog B, centractin beta (yeast) (ACTR1B) | 2.295569658 |  |
|  | Pseudouridylate synthase 7 homolog-like protein | 2.272302151 |  |
|  | cell division cycle 40 homolog (S. cerevisiae) (CDC40) | 2.267938375 |  |
|  | deoxynucleotidyltransferase, terminal (DNTT), transcript variant 1 | 2.262266397 |  |
|  | twinfilin, actin-binding protein, homolog 1 (Drosophila) (TWF1) | 2.254069805 |  |
|  | IKAROS family zinc finger 1 (Ikaros), mRNA (cDNA clone MGC:17055 IMAGE:4338834), complete cds | 2.249711037 |  |
|  | Mitochondrial carrier family protein, mRNA (cDNA clone MGC:17030 IMAGE:4345193), complete cds | 2.242356539 |  |
|  | chromosome 16 open reading frame 80 (C16orf80) | 2.241838932 |  |
|  | Chromosome 3 open reading frame 35 (C3orf35), transcript variant D, mRNA | 2.241608381 |  |
|  | Casein kinase 2, alpha prime polypeptide (CSNK2A2), mRNA | 2.182708502 |  |
|  | AAA1 protein (AAA1), transcript variant III, mRNA | 2.169159412 |  |
|  | chromosome 22 open reading frame 9 (C22orf9), transcript variant 2 | 2.15771699 |  |
|  | pim-2 oncogene (PIM2) | 2.151182652 |  |
|  | small nuclear ribonucleoprotein polypeptide C (SNRPC) | 2.141097069 |  |
|  | glutaryl-Coenzyme A dehydrogenase (GCDH), nuclear gene encoding mitochondrial protein, transcript variant 1 | 2.098296642 |  |
|  | Down syndrome critical region gene 8 (DSCR8), transcript variant 1, mRNA | 2.086241245 |  |
|  | BAI1-associated protein 2 (BAIAP2) | 2.051557302 |  |
|  | mitochondrial trans-2-enoyl-CoA reductase (MECR) | 2.040407181 |  |
|  | DEAD (Asp-Glu-Ala-Asp) box polypeptide 42 (DDX42) | 2.014790058 |  |
|  |  |  |  |
|  |  |  |  |
|  | **Antibody protein target generating increased signal before treatment** | **Fold Change (pre-treatment/post-treatment)** |  |
|  | Protein PPRC1 | 9.466115852 |  |
|  | rabphilin 3A-like (without C2 domains) (RPH3AL) | 3.922476845 |  |
|  | abl-interactor 1 (ABI1) | 2.781165369 |  |
|  | programmed cell death 5 (PDCD5) | 2.769617798 |  |
|  | Dual specificity tyrosine-phosphorylation-regulated kinase 1A | 2.245029422 |  |
|  | Activin receptor type-2A | 2.23224332 |  |
|  | mitochondrial ribosomal protein L19 (MRPL19), nuclear gene encoding mitochondrial protein | 2.212620651 |  |
|  | Alpha-ketoglutarate-dependent dioxygenase alkB homolog 3 | 2.163006908 |  |
|  | angiomotin (AMOT) | 2.057608999 |  |
|  |  |  |  |
